# Supplementary material for: HashClone: a new tool to quantify the minimal residual disease in B-cell lymphoma from deep sequencing data
Source: PubMed Central journal article supplement (PMC5701356; doi:10.1186/s12859-017-1923-2), 2017-11-23
Supplement: 12859_2017_1923_MOESM2_ESM.pdf [file 12859_2017_1923_MOESM2_ESM.pdf]

### Step 1: Sample processing and gDNA extraction

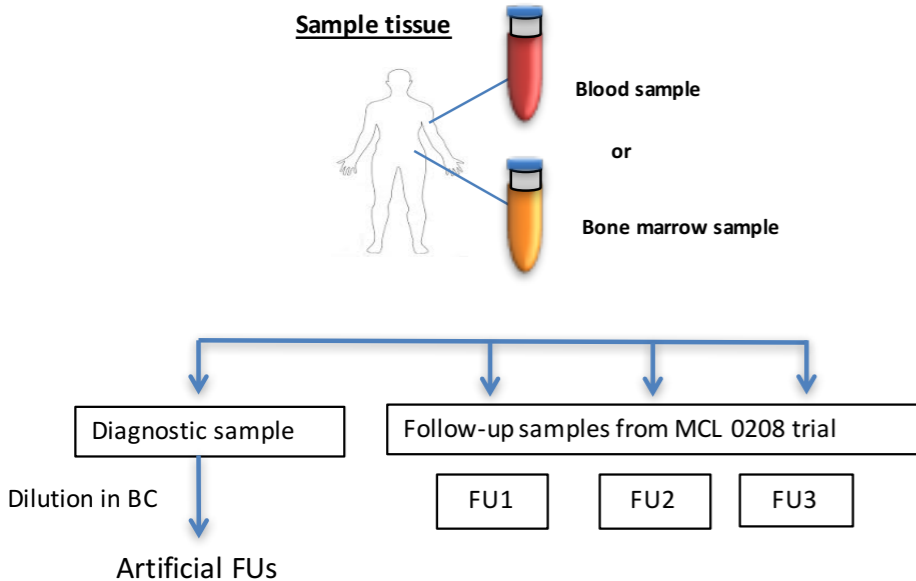

### Step 2: Libraries preparation

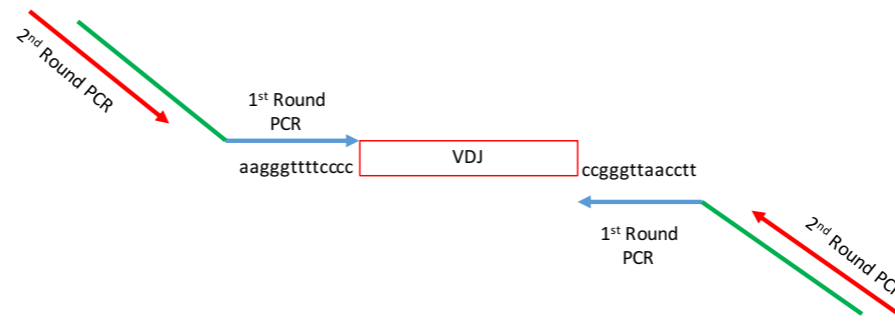

### Step 3: Sequencing and FASTQ quality check

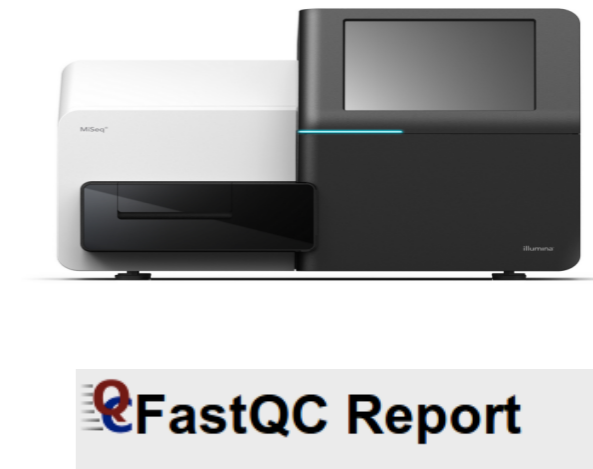

### Step 4: HashClone analysis

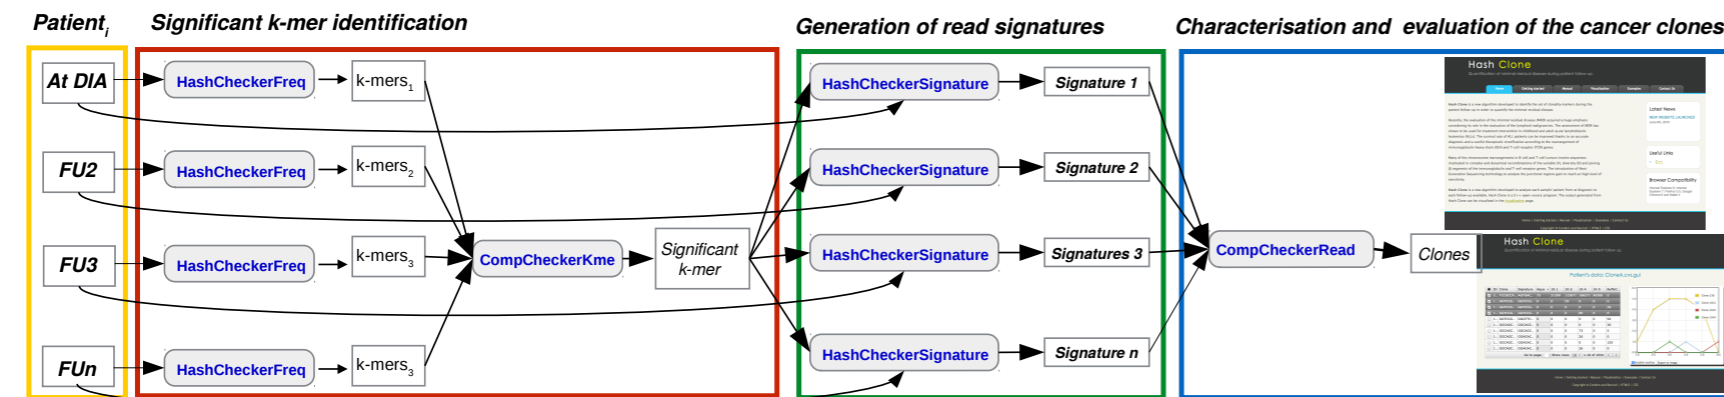

### Step 5: Filtered strategy for B-cell clones selection

**Phase A:**  
Clone selection in diagnostic samples with reads frequency higher than 5%

**Phase B:**  
IMGT software: HashClone-VDJ sequences alignment to IGH reference database to check sequence homology.

### Step 6: MRD monitoring

$$FU \text{ (Q-PCR value)} = \frac{Dia \text{ (Q-PCR value)} \times FU \text{ (NGS reads)}}{Dia \text{ (NGS reads)}}$$
