# Supplementary material for: HashClone: a new tool to quantify the minimal residual disease in B-cell lymphoma from deep sequencing data
Source: PubMed Central journal article supplement (PMC5701356; doi:10.1186/s12859-017-1923-2), 2017-11-23
Supplement: 12859_2017_1923_MOESM3_ESM.pdf [file 12859_2017_1923_MOESM3_ESM.pdf]

| <i>Study<br/>(DNA input )</i> | <i>Patients</i> | <i>Samples<br/>analyzed (n)</i> | <i>Diagnostic<br/>tissue<br/>analyzed</i> | <i>Artificial<br/>FUs (n)</i> | <i>FUs from clinical<br/>trial (n)</i> |
|-------------------------------|-----------------|---------------------------------|-------------------------------------------|-------------------------------|----------------------------------------|
| <b>Pilot 1<br/>(500 ng)</b>   | <b>A</b>        | 4                               | BM*                                       | 3                             | /                                      |
|                               | <b>B</b>        | 4                               | PB*                                       | 3                             | /                                      |
|                               | <b>C</b>        | 4                               | PB                                        | 3                             | /                                      |
|                               | <b>D</b>        | 3                               | BM                                        | 2                             | /                                      |
|                               | <b>E</b>        | 4                               | BM*                                       | 3                             | /                                      |
| <b>Pilot 2<br/>(100 ng)</b>   | <b>A</b>        | 4                               | BM*                                       | /                             | 3                                      |
|                               | <b>B</b>        | 5                               | PB*                                       | /                             | 4                                      |
|                               | <b>E</b>        | 5                               | BM*                                       | /                             | 4                                      |
