# Supplementary material for: HashClone: a new tool to quantify the minimal residual disease in B-cell lymphoma from deep sequencing data
Source: PubMed Central journal article supplement (PMC5701356; doi:10.1186/s12859-017-1923-2), 2017-11-23
Supplement: 12859_2017_1923_MOESM4_ESM.pdf [file 12859_2017_1923_MOESM4_ESM.pdf]

| Study          | Patient              | Number of clonotypes | Number of read associated with clonotype                        |
|----------------|----------------------|----------------------|-----------------------------------------------------------------|
| <i>Pilot 1</i> | <b>A</b>             | 7                    | Major clone: 72698/74542 (98%)<br>Other clones: 1844/74542 (2%) |
|                | <b>B</b>             | 32                   | Major clone:46694/56964(82%)<br>Others:10270/56964(18%)         |
|                | <b>C</b>             | 44                   | Major clone:88674/97018 (91%)<br>Others:8344/97018 (9%)         |
|                | <b>D</b>             | 5                    | Major clone:104908/107808 (97%)<br>Others:2900/107808 (3%)      |
|                | <b>E</b>             | 21                   | Major clone:185456/192947 (96%)<br>Others: 7491/192947 (4%)     |
|                | <b>Average value</b> | <b>22</b>            | <b>Major clone: 93%</b><br><b>Others: 7%</b>                    |
| <i>Pilot 2</i> | <b>A</b>             | 18                   | Major clone: 99414/107825 (92%)<br>Others: 8411/107825 (8%)     |
|                | <b>B</b>             | 72                   | Major clone: 169175/231281 (73%)<br>Others: 62106/231281 (27%)  |
|                | <b>E</b>             | 5                    | Major clone: 85027/85603 (99%)<br>Others: 576/85603 (0,1%)      |
|                | <b>Average value</b> | <b>32</b>            | <b>Major clone: 88%</b><br><b>Others: 12%</b>                   |

**Figure S2 - Clonotypes quantification by Hashclone**
