# Supplementary material for: HashClone: a new tool to quantify the minimal residual disease in B-cell lymphoma from deep sequencing data
Source: PubMed Central journal article supplement (PMC5701356; doi:10.1186/s12859-017-1923-2), 2017-11-23
Supplement: 12859_2017_1923_MOESM5_ESM.pdf [file 12859_2017_1923_MOESM5_ESM.pdf]

|                |                                     |                         | Phase A                           | Phase B                          |
|----------------|-------------------------------------|-------------------------|-----------------------------------|----------------------------------|
| Study          | Patient<br>(only diagnosis samples) | Clonotype<br>identified | Clonotype with<br>frequency > 100 | Clonotype associated with<br>VDJ |
| <i>Pilot 1</i> | <b>A</b>                            | 159                     | 49                                | 30                               |
|                | <b>B</b>                            | 171                     | 51                                | 31                               |
|                | <b>C</b>                            | 163                     | 51                                | 43                               |
|                | <b>D</b>                            | 129                     | 50                                | 42                               |
|                | <b>E</b>                            | 165                     | 52                                | 38                               |
|                | <b>Average value</b>                | <b>157</b>              | <b>51</b>                         | <b>37</b>                        |
| <i>Pilot 2</i> | <b>A</b>                            | 138                     | 43                                | 34                               |
|                | <b>B</b>                            | 196                     | 72                                | 50                               |
|                | <b>E</b>                            | 108                     | 45                                | 39                               |
|                | <b>Average value</b>                | <b>114</b>              | <b>53</b>                         | <b>41</b>                        |

**Figure S3 - Clonotypes identification by ViDJil**
