# Supplementary material for: HashClone: a new tool to quantify the minimal residual disease in B-cell lymphoma from deep sequencing data
Source: PubMed Central journal article supplement (PMC5701356; doi:10.1186/s12859-017-1923-2), 2017-11-23
Supplement: 12859_2017_1923_MOESM6_ESM.pdf [file 12859_2017_1923_MOESM6_ESM.pdf]

| Study          | Patient              | Number of clonotype | Number of read associated with Clonotype                        |
|----------------|----------------------|---------------------|-----------------------------------------------------------------|
| <i>Pilot 1</i> | <b>A</b>             | 30                  | Major clone: 83974/86619 (97%)<br>Other clones: 2645/86619 (3%) |
|                | <b>B</b>             | 31                  | Major clone: 58620/65302 (90%)<br>Others: 6682/65302 (10%)      |
|                | <b>C</b>             | 43                  | Major clone: 108386/121593 (98%)<br>Others: 13207/121593 (2%)   |
|                | <b>D</b>             | 42                  | Major clone: 180075/183559 (98%)<br>Others: 3484/183559 (2%)    |
|                | <b>E</b>             | 38                  | Major clone: 217524/217917(99%)<br>Others: 393/217917 (1%)      |
|                | <b>Average value</b> | <b>37</b>           | <b>Major clone: 96%</b><br><b>Others: 4%</b>                    |
| <i>Pilot 2</i> | <b>A</b>             | 0                   | /                                                               |
|                | <b>B</b>             | 0                   | /                                                               |
|                | <b>E</b>             | 0                   | /                                                               |

**Figure S4 - Clonotypes quantification by ViDJil**
